# Supplementary material for: Differential expression of conserved and novel microRNAs during tail regeneration in the lizard Anolis carolinensis
Source: PubMed Central journal article supplement (PMC4858913; doi:10.1186/s12864-016-2640-3), 2016-05-05
Supplement: 12864_2016_2640_MOESM8_ESM.pdf [file 12864_2016_2640_MOESM8_ESM.pdf]

|                                                           |     |   |     |
|-----------------------------------------------------------|-----|---|-----|
| gcuggucaaaaggaaccaaggcugucuccuugaagguuugguccccuuuaaccagcu | 23  | 0 | BRN |
| .....uuugguccccuuuaaccagcu                                |     |   |     |
| gcuggucaaaaggaGcca.....                                   | 1   | 1 | TP1 |
| gcuggucaaaaggaaccaaggc.....                               | 11  | 0 | TP1 |
| gcuggucaaaaggaaccaaggU.....                               | 1   | 1 | TP1 |
| gcuggucaaaaggaaccaaggcu.....                              | 14  | 0 | TP1 |
| gcuggucaaaaggaaccaaggcugucuccuugaag.....                  | 1   | 0 | TP1 |
| .....uuugguccccuuuaaccagc.                                | 3   | 0 | TP1 |
| .....uuugguccccuuuaaccagcu                                | 46  | 0 | TP1 |
| .....uuugguccccuuuaaccagcA                                | 1   | 1 | TP1 |
| gcuggucaaaaggaaccaag.....                                 | 2   | 0 | BS1 |
| gcuggucaaaaggaaccaaggc.....                               | 37  | 0 | BS1 |
| gcuggucaaaaggaaccaaggcu.....                              | 27  | 0 | BS1 |
| gcuggucaaaaggaaccaaggcC.....                              | 1   | 1 | BS1 |
| gcuggucaaaaggaaccaaggcA.....                              | 1   | 1 | BS1 |
| gcuggucaaaaggaaccaaggcuU.....                             | 3   | 1 | BS1 |
| gcuggucaaaaggaaccaaggcugu.....                            | 1   | 0 | BS1 |
| gcuggucaaaaggaaccaaggcugucuc.....                         | 1   | 0 | BS1 |
| gcuggucaaaaggaaccaaggcugucuccuugaag.....                  | 2   | 0 | BS1 |
| ..uggucaaaaggaaccaaggc.....                               | 1   | 0 | BS1 |
| .....cggcugucuccuugaagg.....                              | 1   | 0 | BS1 |
| .....Cuugguccccuuuaaccagcu                                | 1   | 1 | BS1 |
| .....uuugguccccuuuaaccagc.                                | 23  | 0 | BS1 |
| .....uuugguccccuuuaaccagcA                                | 11  | 1 | BS1 |
| .....Cuugguccccuuuaaccagcu                                | 1   | 1 | BS1 |
| .....uuCgguccccuuuaaccagcu                                | 1   | 1 | BS1 |
| .....uuugguccccuuuaaccagcu                                | 554 | 0 | BS1 |
| .....uuuggucUccuuuaaccagcu                                | 1   | 1 | BS1 |
| .....uugguccccuuuaaccagcu                                 | 2   | 0 | BS1 |
| .....ugguccccuuuaaccagcu                                  | 4   | 0 | BS1 |
| gcuggucaaaaggaaccaaggc.....                               | 6   | 0 | TP2 |
| gcuggucaaaaggaaccaaggcu.....                              | 15  | 0 | TP2 |
| .....uuugguccccuuuaaccagcu                                | 15  | 0 | TP2 |
