# Supplementary material for: Differential expression of conserved and novel microRNAs during tail regeneration in the lizard Anolis carolinensis
Source: PubMed Central journal article supplement (PMC4858913; doi:10.1186/s12864-016-2640-3), 2016-05-05
Supplement: 12864_2016_2640_MOESM9_ESM.pdf [file 12864_2016_2640_MOESM9_ESM.pdf]

miRBase precursor : 5\_10675  
 Total read count : 1783  
 5\_10675 read count : 1631  
 remaining reads : 152

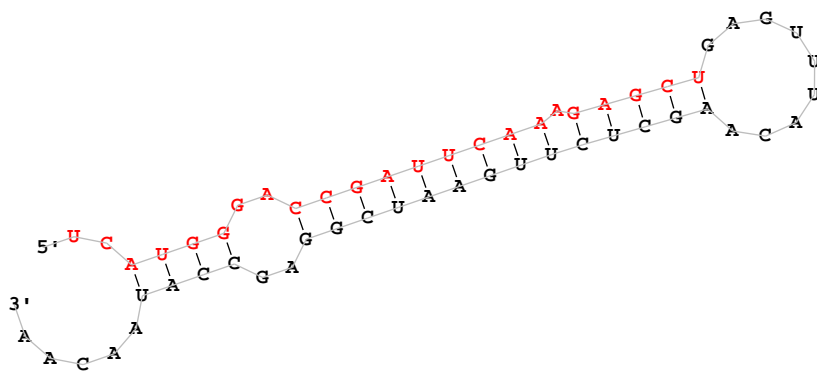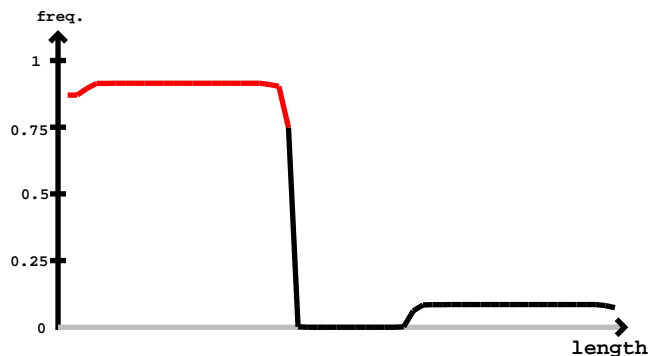

5\_10675

| 5'-                            | 3'-                               | exp | reads | mm | sample |
|--------------------------------|-----------------------------------|-----|-------|----|--------|
| ucaugggaccgauucaaaagagcu       | gaguuuacaagcucuugaaucggagccauaaca |     |       |    |        |
| ..(((..(((.....)))))).....     |                                   |     |       |    |        |
| ucaugggaccgauucCaagagc.....    |                                   |     | 54    | 1  | BS2    |
| ucaugggaccgauucCaagagcu.....   |                                   |     | 333   | 1  | BS2    |
| ucaugggaccgauucaaaagagcu.....  |                                   |     | 7     | 0  | BS2    |
| .caugggaccgauucCaagagc.....    |                                   |     | 1     | 1  | BS2    |
| .caugggaccgauucaaaagagcu.....  |                                   |     | 2     | 0  | BS2    |
| .caugggaccgauucCaagagcu.....   |                                   |     | 2     | 1  | BS2    |
| ..augggaccgauucCaagagcu.....   |                                   |     | 1     | 1  | BS2    |
| .....Ccuugaaucggagccauaaca.    |                                   |     | 1     | 1  | BS2    |
| .....ucuGgaaucggagccauaaca     |                                   |     | 2     | 1  | BS2    |
| .....ucuugaaucggagccauaacaC    |                                   |     | 1     | 1  | BS2    |
| .....ucuugaaucggagccauaaca     |                                   |     | 17    | 0  | BS2    |
| .....cuugaaucggagccauaaca      |                                   |     | 7     | 0  | BS2    |
| .....uugaaucggagccauaaca       |                                   |     | 1     | 0  | BS2    |
| ucaugggaccgauucCaagagc.....    |                                   |     | 12    | 1  | TP3    |
| ucaugggaccgauucaaaagagcu.....  |                                   |     | 4     | 0  | TP3    |
| ucaugggaccgauucCaagagcu.....   |                                   |     | 39    | 1  | TP3    |
| ucaugggaccgauucaaaagagcuA..... |                                   |     | 1     | 1  | TP3    |
| .....ucuugaaucggagccauaaca     |                                   |     | 1     | 0  | TP3    |
| ucaugggaccgauucCaagagc.....    |                                   |     | 49    | 1  | MUS    |
| ucaugggaccgauucaaaagagc.....   |                                   |     | 1     | 0  | MUS    |
| ucaugggaccgauucaaaagagcu.....  |                                   |     | 1     | 0  | MUS    |
| ucaugggaccgauucCaagagcu.....   |                                   |     | 106   | 1  | MUS    |
| .caugggaccgauucCaagagcu.....   |                                   |     | 4     | 1  | MUS    |
| ..augggaccgauucCaagagc.....    |                                   |     | 3     | 1  | MUS    |
| ..augggaccgauucCaagagcu.....   |                                   |     | 3     | 1  | MUS    |
| .....ucuugaaucggagccauaaca.    |                                   |     | 2     | 0  | MUS    |
| .....ucuugaaucggagccauaaca     |                                   |     | 5     | 0  | MUS    |
| .....cuugaaucggagccauaaca      |                                   |     | 3     | 0  | MUS    |
| ucaugggaccgauucaaaaga.....     |                                   |     | 6     | 0  | BRN    |
| ucaugggacUgauucaaaagag.....    |                                   |     | 1     | 1  | BRN    |
| ucaugggaccgauucaaaagag.....    |                                   |     | 5     | 0  | BRN    |
| ucaugggaccgauucCaagag.....     |                                   |     | 5     | 1  | BRN    |

|                                                          |     |   |     |
|----------------------------------------------------------|-----|---|-----|
| ucaugggaccgauucaaaagagcugaguuuacaagcucuugaucggagccauaaca |     |   |     |
| ucaugggaccgauucaaaagagc.....                             | 20  | 0 | BRN |
| ucaugggaccgauucCaagagc.....                              | 38  | 1 | BRN |
| ucaugggaccgauucaaaagagU.....                             | 2   | 1 | BRN |
| ucaugggaccgauucaaaagagA.....                             | 7   | 1 | BRN |
| ucaugggaccgauucCaagagc.....                              | 80  | 1 | BRN |
| ucaugggaccgauucaaaagagcU.....                            | 53  | 0 | BRN |
| ucaugggaccgauucaaaagagcU.....                            | 1   | 1 | BRN |
| .caugggaccgauucaaaagagc.....                             | 1   | 0 | BRN |
| .caugggaccgauucCaagagc.....                              | 1   | 1 | BRN |
| .caugggaccgauucaaaagagcA.....                            | 3   | 1 | BRN |
| .caugggaccgauucaaaagagcU.....                            | 13  | 0 | BRN |
| .caugggaccgauucCaagagc.....                              | 1   | 1 | BRN |
| ..augggaccgauucaaaagU.....                               | 1   | 1 | BRN |
| ..augggaccgauucCaagagc.....                              | 1   | 1 | BRN |
| ..augggaccgauucaaaagagc.....                             | 1   | 0 | BRN |
| ..augggaccgauucaaaagagcU.....                            | 4   | 0 | BRN |
| ..augggaccgauucCaagagc.....                              | 2   | 1 | BRN |
| .....ucugaucggagccauaac.....                             | 3   | 0 | BRN |
| .....ucugaaucggagccauaac.....                            | 1   | 1 | BRN |
| .....ucugaucggagccauaacU.....                            | 1   | 1 | BRN |
| .....ucugaaucggagccauaaca.....                           | 1   | 1 | BRN |
| .....ucugaaucggagccauaaca.....                           | 19  | 1 | BRN |
| .....ucugaucggagccauaaca.....                            | 14  | 0 | BRN |
| .....cuugaucggagccauaac.....                             | 2   | 0 | BRN |
| .....cuugaucggagccauaaca.....                            | 3   | 0 | BRN |
| .....cuugaucggagccauaaca.....                            | 12  | 0 | BRN |
| .....cuugaucggagccauaaca.....                            | 2   | 1 | BRN |
| .....uugaucggagccauaaca.....                             | 1   | 0 | BRN |
| .....gaaucggagccauaaca.....                              | 1   | 0 | BRN |
| ucaugggaccgauucCaagagc.....                              | 3   | 1 | TP2 |
| ucaugggaccgauucaaaagagcU.....                            | 4   | 0 | TP2 |
| ucaugggaccgauucCaagagcU.....                             | 10  | 1 | TP2 |
| .....ucugaucggagccauaaca.....                            | 1   | 0 | TP2 |
| ucaugggaccgauucaaaagag.....                              | 1   | 0 | TP1 |
| ucaugggaccgauucCaagagc.....                              | 8   | 1 | TP1 |
| ucaugggaccgauucCaagagcU.....                             | 47  | 1 | TP1 |
| ucaugggaccgauucaaaagagcU.....                            | 1   | 0 | TP1 |
| ..augggaccgauucCaagagcU.....                             | 3   | 1 | TP1 |
| .....ucugaucggagccauaac.....                             | 1   | 1 | TP1 |
| .....ucugaucggagccauaaca.....                            | 4   | 0 | TP1 |
| ucaugggaccgauucaaaaga.....                               | 1   | 0 | BS1 |
| ucaugggaccgauucCaagagc.....                              | 22  | 1 | BS1 |
| ucaugggaccgauucCaagagcU.....                             | 262 | 1 | BS1 |
| ucaugggaccgauucCaagagcug.....                            | 1   | 1 | BS1 |
| .caugggaccgauucCaagagc.....                              | 1   | 1 | BS1 |
| .caugggaccgauucaaaagagc.....                             | 1   | 0 | BS1 |
| .caugggaccgauucCaagagcU.....                             | 7   | 1 | BS1 |
| ..augggaccgauucCaagagc.....                              | 1   | 1 | BS1 |
| ..augggaccgauucCaagagcU.....                             | 9   | 1 | BS1 |
| .....cucuugaucggagccauaaca.....                          | 1   | 0 | BS1 |
| .....cucuugaucggagccauaaca.....                          | 2   | 0 | BS1 |
| .....ucugaucggagccauaaca.....                            | 1   | 1 | BS1 |
| .....ucugaucggagccauaaca.....                            | 3   | 0 | BS1 |
| .....ucugaucggagccauaaca.....                            | 13  | 0 | BS1 |
| .....ucugaucggagccauaaca.....                            | 1   | 1 | BS1 |
| .....cuugaucggagccauaaca.....                            | 2   | 0 | BS1 |
| ucaugggaccgauucCaagag.....                               | 1   | 1 | BS3 |
| ucaugggaccgauucCaagagc.....                              | 46  | 1 | BS3 |
| ucaugggaccgauucCaagagcU.....                             | 313 | 1 | BS3 |
| ucaugggaccgauucaaaagagcU.....                            | 6   | 0 | BS3 |
| ucaugggaccgauucGaagagcU.....                             | 1   | 1 | BS3 |
| .caugggaccgauucCaagagc.....                              | 2   | 1 | BS3 |
| .caugggaccgauucCaagagcU.....                             | 4   | 1 | BS3 |
| .caugggaccgauucaaaagagcU.....                            | 1   | 0 | BS3 |
| ..augggaccgauucaaaagagcU.....                            | 1   | 0 | BS3 |
| ..augggaccgauucCaagagcU.....                             | 4   | 1 | BS3 |

5\_10675

|                                                           |    |   |     |
|-----------------------------------------------------------|----|---|-----|
| ucaugggaccgauucaaaagagcugaguuuacaagcucuugaaucggagccauaaca |    |   |     |
| ...gggaccgauucCaagagcu.....                               | 1  | 1 | BS3 |
| .....ucugaaucggagccauaaca                                 | 15 | 0 | BS3 |
| .....cuugaaucggagccauaaca                                 | 8  | 0 | BS3 |
