# Supplementary material for: Differential expression of conserved and novel microRNAs during tail regeneration in the lizard Anolis carolinensis
Source: PubMed Central journal article supplement (PMC4858913; doi:10.1186/s12864-016-2640-3), 2016-05-05
Supplement: 12864_2016_2640_MOESM10_ESM.pdf [file 12864_2016_2640_MOESM10_ESM.pdf]

miRBase precursor : GL343237.1\_6814  
 Total read count : 32  
 GL343237.1\_6814 read count : 27  
 remaining reads : 5

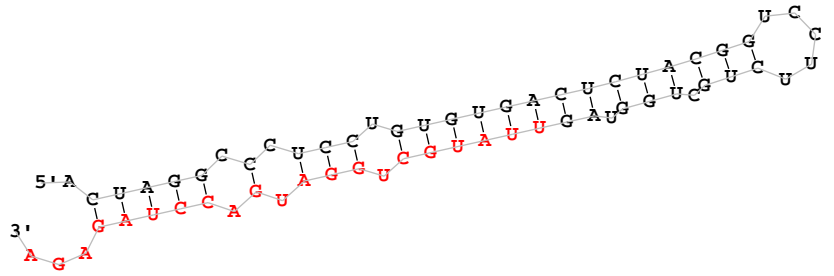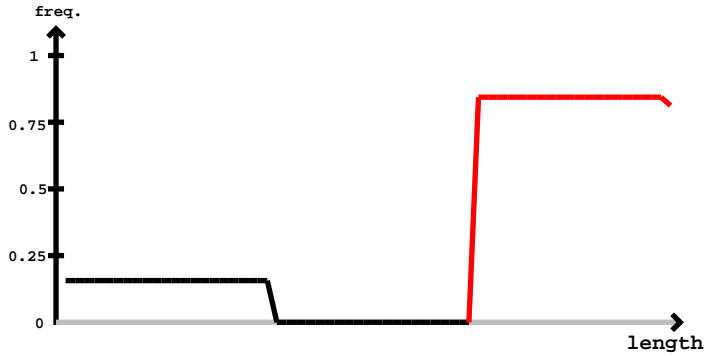

| GL343237.1_6814 |                                                                                          | exp | reads | mm | sample |
|-----------------|------------------------------------------------------------------------------------------|-----|-------|----|--------|
| 5'-             | acuaggcccuccugugugacuacgguccuucugcugguagu <u>uuau</u> <b>g</b> cug <b>gaug</b> accuagaga | -3' |       |    |        |
|                 | .....(((((((.....)))))).....)).....                                                      |     | 1     | 0  | BS2    |
|                 | .....uuau <b>g</b> cug <b>gaug</b> accuagag.                                             |     | 6     | 0  | BS2    |
|                 | .....uuau <b>g</b> cug <b>gaug</b> accuagaga                                             |     | 1     | 0  | BRN    |
|                 | acuaggcccuccugugugacu.....                                                               |     | 3     | 0  | BS1    |
|                 | .....uuau <b>g</b> cug <b>gaug</b> accuagaga                                             |     | 13    | 0  | BS1    |
|                 | acuaggcccuccugugugacu.....                                                               |     | 2     | 0  | BS3    |
|                 | .....uuau <b>g</b> cug <b>gaug</b> accuagaga                                             |     | 6     | 0  | BS3    |
